# Supplementary material for: Photoperiodic Modulation of Circadian Clock and Reproductive Axis Gene Expression in the Pre-Pubertal European Sea Bass Brain
Source: PLoS One. 2015 Dec 7;10(12):e0144158. doi: 10.1371/journal.pone.0144158 (PMC4671726; doi:10.1371/journal.pone.0144158)
Supplement: S4 Table — (XLSX) [file pone.0144158.s005.xlsx]

## Sheet: acc numbers
Gene description	Gene symbol	Entrez gene ID
agouti related protein	Agrp	11604
aldo-keto reductase family 1, member B3 (aldose reductase)	Akr1b3	11677
aldo-keto reductase family 1, member C2 (dihydrodiol dehydrogenase 2; bile acid binding protein; 3-alpha hydroxysteroid dehydrogenase, type III)	akr1c2	1646
aldolase B, fructose-bisphosphate	Aldob	230163
angiopoietin 2	ANGPT2	11601
angiotensin II receptor, type 1a	Agtr1a	11607
anti-Mullerian hormone	Amh	11705
aquaporin 4	AQP4	11829
aryl hydrocarbon receptor nuclear translocator-like	arntl	11865
aryl hydrocarbon receptor nuclear translocator-like 2; similar to aryl hydrocarbon receptor nuclear translocator-like 2	ARNTL2	272322
arylalkylamine N-acetyltransferase	Aanat	11298
asparagine synthetase	asnS	27053
aspartylglucosaminidase	aga	11593
ATPase, H+/K+ exchanging, beta polypeptide	ATP4B	11945
ATPase, H+/K+ exchanging, gastric, alpha polypeptide	ATP4A	11944
ATP-binding cassette, sub-family G (WHITE), member 1	ABCG1	11307
baculoviral IAP repeat-containing 2	birc2	11797
B-cell leukemia/lymphoma 10; predicted gene 6141	BCL10	12042
beta-transducin repeat containing protein	btrc	12234
bone morphogenetic protein 4	BMP4	12159
cadherin 2; similar to N-cadherin	CDH2	12558
calcium-sensing receptor	Casr	12374
calpastatin	cast	12380
cAMP responsive element binding protein 1	CREB1	12912
cannabinoid receptor 1 (brain)	cnr1	12801
carbohydrate (N-acetylglucosamine 6-O) sulfotransferase 5	Chst5	23563
carbonic anhydrase 2	Car2	12349
CD163 antigen	CD163	93671
CD36 antigen	CD36	12491
chemokine (C-C motif) ligand 7	CCL7	20306
chemokine (C-C motif) ligand 8	ccl8	20307
chemokine (C-C motif) receptor 5	CCR5	12774
chemokine (C-C motif) receptor 7	CCR7	12775
chemokine (C-X-C motif) receptor 4	CXCR4	12767
chymotrypsin-like elastase family, member 1	CELA1	109901
circadian locomoter output cycles kaput	CLOCK	12753
collagen, type XII, alpha 1	col12a1	12816
complement receptor 2	CR2	12902
cyclin D binding myb-like transcription factor 1	Dmtf1	23857
cyclin-dependent kinase inhibitor 2A	CDKN2A	12578
cytochrome P450, family 1, subfamily a, polypeptide 1	CYP1A1	13076
cytochrome P450, family 26, subfamily a, polypeptide 1	Cyp26a1	13082
cytochrome P450, subfamily IIC6	Cyp2c6	246070
defensin beta 7	DEFB7	246080
dihydropyrimidine dehydrogenase	DPYD	99586
dopamine receptor D1A	Drd1a	13488
dystonin; hypothetical protein LOC100047109	DST	13518
dystrophin, muscular dystrophy	dmd	13405
ectonucleotide pyrophosphatase/phosphodiesterase 2	ENPP2	18606
EGF-like module containing, mucin-like, hormone receptor-like sequence 1	EMR1	13733
EGL nine homolog 3 (C. elegans)	egln3	112407
epidermal growth factor receptor	egfr	13649
estrogen receptor 2 (beta)	ESR2	13983
eukaryotic translation initiation factor 4, gamma 2	EIF4G2	13690
fatty acid binding protein 4, adipocyte	FABP4	11770
fatty acid binding protein 7, brain	Fabp7	12140
FBJ osteosarcoma oncogene	FOS	14281
fibrinogen-like protein 2	FGL2	14190
fibroblast growth factor receptor 2	FGFR2	14183
fibulin 2	FBLN2	14115
FK506 binding protein 5	FKBP5	14229
forkhead box D4	FOXD4	14237
fusion, derived from t(12;16) malignant liposarcoma (human)	fus	233908
galactose-1-phosphate uridyl transferase	galT	14430
growth arrest and DNA-damage-inducible 45 alpha	GADD45A	13197
haptoglobin	HP	15439
HNF1 homeobox A	HNF1A	21405
homeo box B5	hoxb5	15413
homeo box B6	HOXB6	15414
homeo box gene expressed in ES cells	hesx1	15209
hydroxysteroid 11-beta dehydrogenase 1	HSD11B1	15483
immunoglobulin heavy constant gamma 1 (G1m marker)	Ighg1	16017
immunoglobulin joining chain	Igj	16069
importin 7	IPO7	233726
inhibitor of DNA binding 1	id1	15901
inhibitor of growth family, member 2	ING2	69260
insulin II	Ins2	16334
insulin-like growth factor binding protein 1	IGFBP1	16006
integrin alpha 2	ITGA2	16398
interferon regulatory factor 2	irf2	16363
interferon regulatory factor 6	irf6	54139
interleukin 1 beta	IL1B	16176
interleukin 10	il10	16153
interleukin 12 receptor, beta 2	IL12RB2	16162
interleukin 18	IL18	16173
interleukin 2; similar to Interleukin-2 precursor (IL-2) (T-cell growth factor) (TCGF)	IL2	16183
intraflagellar transport 172 homolog (Chlamydomonas)	IFT172	67661
ISG15 ubiquitin-like modifier; predicted gene 9706	ISG15	100038882
kinase insert domain protein receptor	KDR	16542
KiSS-1 metastasis-suppressor	KISS1	280287
KISS1 receptor	Kiss1r	114229
Kruppel-like factor 5	Klf5	12224
laminin, alpha 1	LAMA1	16772
LIM domain only 2	LMO2	16909
melanocortin 2 receptor	MC2R	17200
meprin 1 alpha	Mep1a	17287
methionine sulfoxide reductase A	msrA	110265
mucin 2	muc2	17831
NEL-like 1 (chicken)	Nell1	338352
netrin G1	Ntng1	80883
neurotensin	Nts	67405
NF-kappaB repressing factor	NKRF	77286
nitric oxide synthase 2, inducible	NOS2	18126
nuclear receptor subfamily 3, group C, member 2	NR3C2	110784
nucleotide-binding oligomerization domain containing 1	NOD1	107607
olfactory marker protein	omp	18378
optineurin	OPTN	71648
oxidized low density lipoprotein (lectin-like) receptor 1	Olr1	108078
oxytocin	OXT	18429
phosphate regulating gene with homologies to endopeptidases on the X chromosome (hypophosphatemia, vitamin D resistant rickets)	PHEX	18675
predicted gene 5604; keratin 8	krt8	16691
predicted gene 7996; high mobility group AT-hook 2	HMGA2	15364
predicted gene 7997; lactate dehydrogenase A; predicted gene 5452	LdhA	16828
predicted gene 9811; ribosomal protein L14	rpl14	67115
prolactin receptor	PRLR	19116
protein kinase, cAMP dependent regulatory, type II alpha	PRKAR2A	19087
protein tyrosine phosphatase-like A domain containing 1	ptplad1	57874
protocadherin 11 X-linked	PCDH11X	245578
pyruvate dehydrogenase E1 alpha 1 pseudogene; pyruvate dehydrogenase (lipoamide) alpha 1	Pdha1	29554
RAD17 homolog (S. pombe)	RAD17	19356
recombination activating gene 2	Rag2	19374
regenerating islet-derived 3 alpha	Reg3a	19694
reticulon 4	rtn4	68585
reversion-inducing-cysteine-rich protein with kazal motifs; similar to Reversion-inducing cysteine-rich protein with Kazal motifs precursor (mRECK)	RECK	53614
rhodopsin	rho	212541
runt-related transcription factor 1; translocated to, 1 (cyclin D-related)	RUNX1T1	12395
ryanodine receptor 1, skeletal muscle	RYR1	20190
secreted acidic cysteine rich glycoprotein; similar to Secreted acidic cysteine rich glycoprotein	SPARC	20692
selectin, endothelial cell	SELE	20339
serine (or cysteine) peptidase inhibitor, clade A, member 6	SERPINA6	12401
serine (or cysteine) peptidase inhibitor, clade B, member 7	SERPINB7	116872
serine (or cysteine) peptidase inhibitor, clade B, member 9	SERPINB9	20723
sigma non-opioid intracellular receptor 1	SIGMAR1	18391
similar to adenomatosis polyposis coli; adenomatosis polyposis coli	APC	11789
similar to EDA-A1; ectodysplasin-A	eda	13607
similar to homeobox protein; homeobox, msh-like 2	MSX2	17702
similar to Wilms tumor homolog; Wilms tumor 1 homolog	wt1	22431
sodium channel, voltage-gated, type X, alpha	Scn10a	20264
solute carrier family 22 (organic cation transporter), member 2	slc22a2	20518
solute carrier family 4 (anion exchanger), member 2	SLC4A2	20535
S-phase kinase-associated protein 2 (p45)	Skp2	27401
SRY-box containing gene 13	SOX13	20668
sterol regulatory element binding transcription factor 1	Srebf1	20787
surfeit gene 6	SURF6	20935
survival motor neuron 1	Smn1	20595
survival of motor neuron 1, telomeric; survival of motor neuron 2, centromeric	smn2	6607
tenascin R	TNR	21960
thromboxane A synthase 1, platelet	TBXAS1	21391
tissue factor pathway inhibitor 2	TFPI2	21789
transformation related protein 73	Trp73	22062
tumor necrosis factor (ligand) superfamily, member 10	TNFSF10	22035
tumor necrosis factor (ligand) superfamily, member 15	TNFSF15	326623
tumor necrosis factor receptor superfamily, member 11b (osteoprotegerin)	tnfrsf11b	18383
UDP-Gal:betaGlcNAc beta 1,4- galactosyltransferase, polypeptide 1	B4GALT1	14595
X-box binding protein 1	Xbp1	22433
zona pellucida glycoprotein 2	ZP2	22787
zona pellucida glycoprotein 3	zp3	22788
